# Supplementary material
Source: PubMed Central journal article supplement (PMC4226385)
Supplement: supp_pp.114.248112_248112rev_Sup-fig_6.pdf [file supp_pp.114.248112_248112rev_Sup-fig_6.pdf]

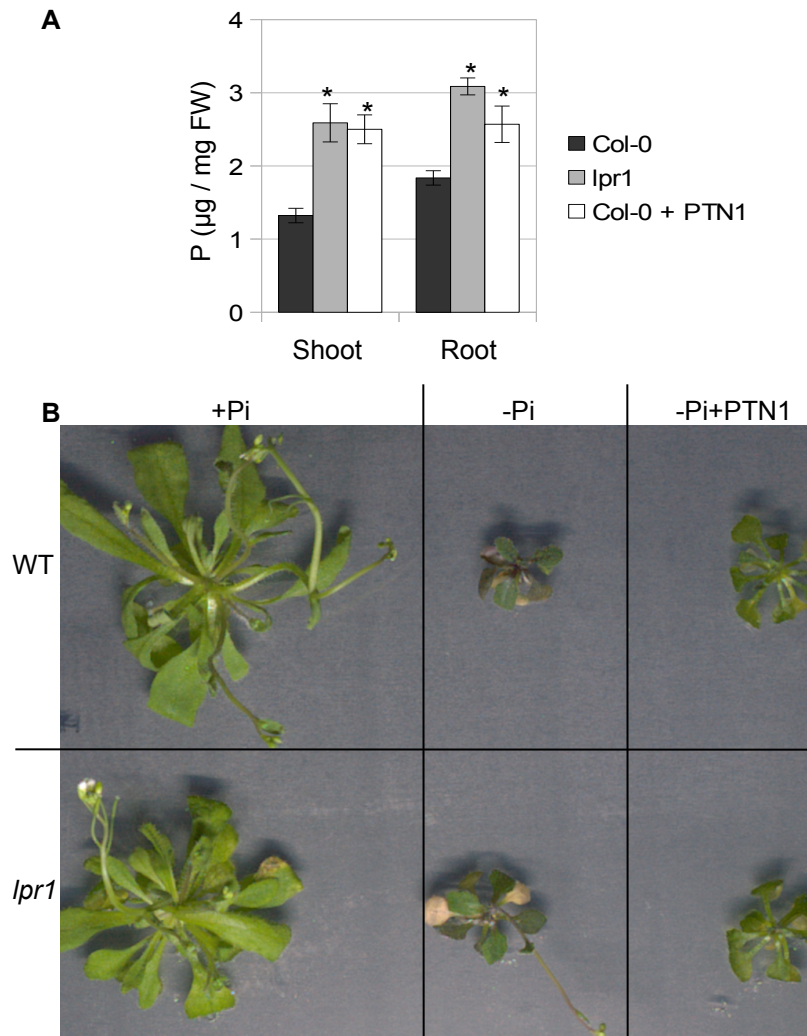

**Supplemental Figure S6. The *lpr1* mutant responds to PTN1 addition.**

(A) Impact of the *lpr1* mutation on P content. Measurements of P content in the *lpr1* mutant and WT were performed on 14-day-old plants. (B) Impact of the *lpr1* mutation on shoot growth in the Pi starvation condition. WT and *lpr1* 28-day-old plants were grown on -Pi, -Pi +PTN1 40 µM or +Pi conditions.
