# Supplementary material
Source: PubMed Central journal article supplement (PMC4226385)
Supplement: supp_pp.114.248112_248112rev_Sup-fig_7.pdf [file supp_pp.114.248112_248112rev_Sup-fig_7.pdf]

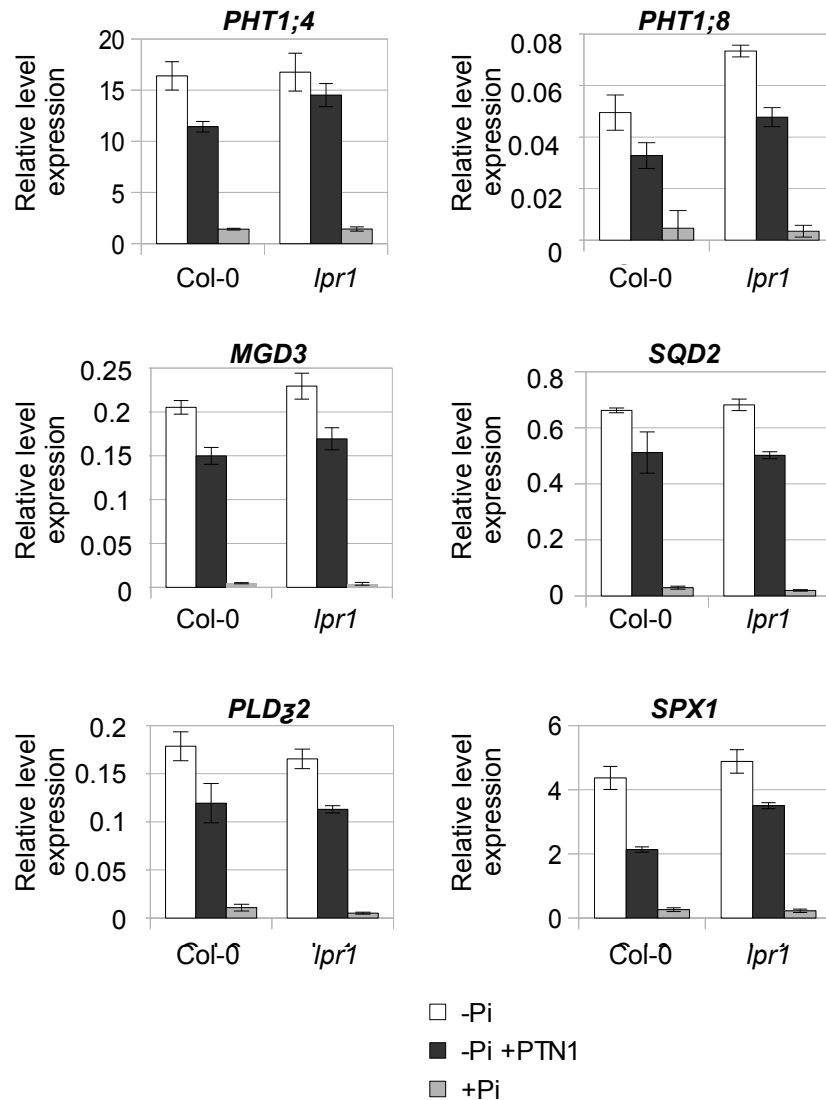

**Supplemental Figure S7.** Molecular responses of *lpr1* seedlings to PTN1 treatment qPCR assays of genes regulated by Pi starvation in the WT Col-0 and the mutant *lpr1* were performed on 14-day-old plants. Similar expression patterns were observed between the two lines.
