# Supplementary material
Source: PubMed Central journal article supplement (PMC4226385)
Supplement: supp_pp.114.248112_248112Sup_Fig_1.pdf [file supp_pp.114.248112_248112Sup_Fig_1.pdf]

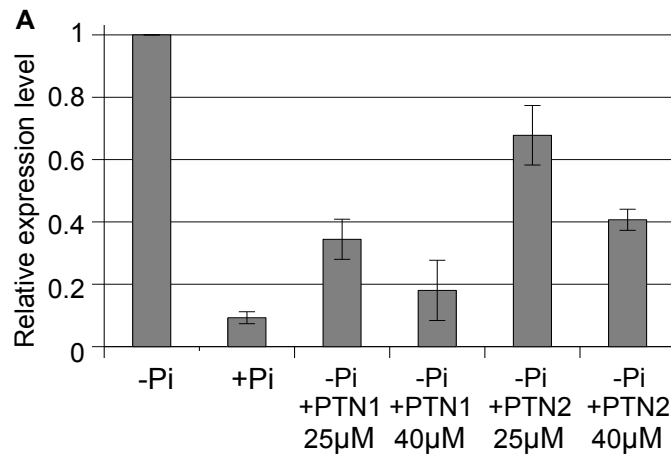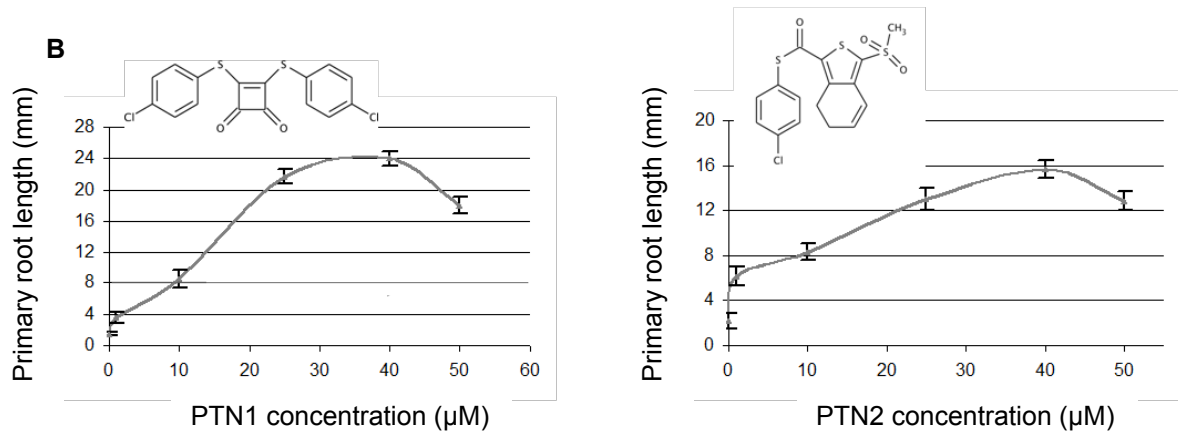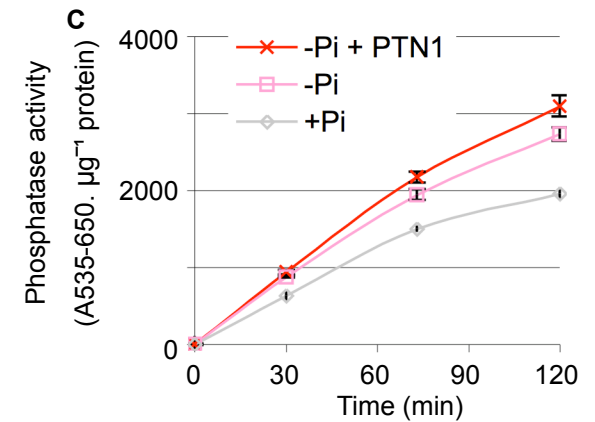

**Supplemental Figure S1.** Impact of PTN treatments on *PHT1;4* expression and phosphatase activity

(A) Impact of PTN1 and PTN2 treatments on *PHT1;4* transcript level. Measurements are from qPCR experiments on root mRNA, extracted from assayed plants. (B) Impact of PTN1 and PTN2 concentration on primary root length. (C) Impact of PTN1 treatment on phosphatase activity. Data are assays of activity on root samples of 7-day-old plants grown on -Pi, -Pi +PTN1 40 µM or +Pi conditions.
