# Supplementary material
Source: PubMed Central journal article supplement (PMC4226385)
Supplement: supp_pp.114.248112_248112Sup_fig_2.pdf [file supp_pp.114.248112_248112Sup_fig_2.pdf]

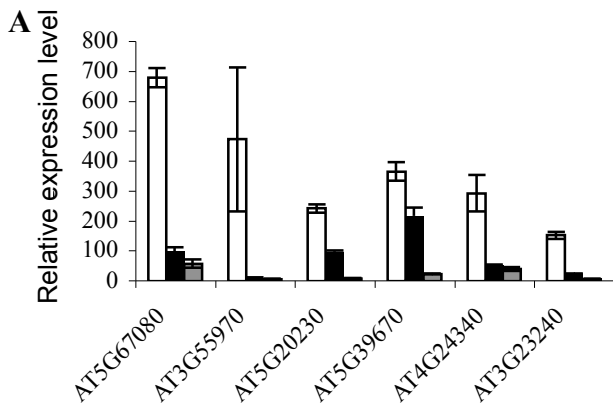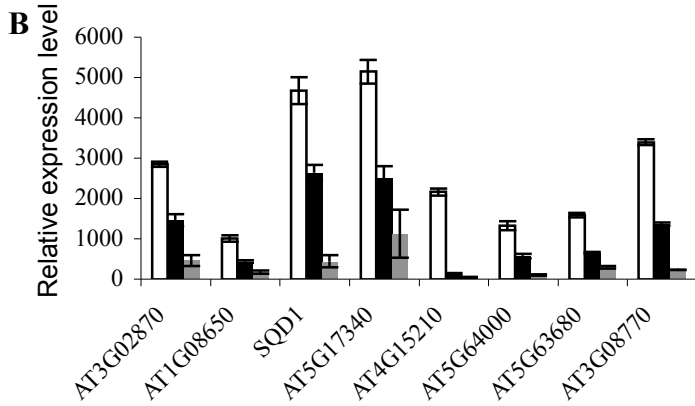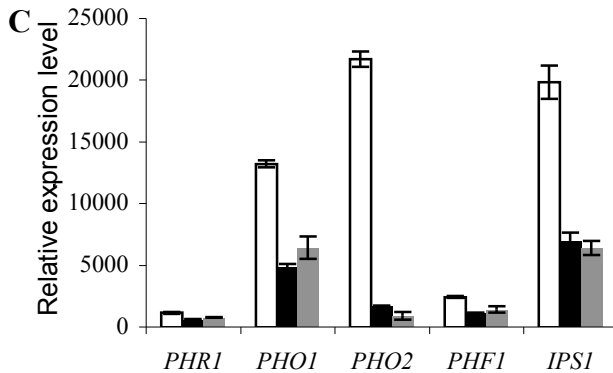

**Supplemental Figure S2.** PTN1 represses several genes regulated by Pi starvation.

RT-qPCR experiments on 14-day-old plants grown on -Pi (white bars), -Pi + PTN1 40 μM (black bars) and +Pi (grey bars). **(A)** locally induced genes. **(B)** systemically induced genes. **(C)**, key regulators involved in the Pi starvation responses.
