# Supplementary material
Source: PubMed Central journal article supplement (PMC4226385)
Supplement: supp_pp.114.248112_248112Sup_fig_4.pdf [file supp_pp.114.248112_248112Sup_fig_4.pdf]

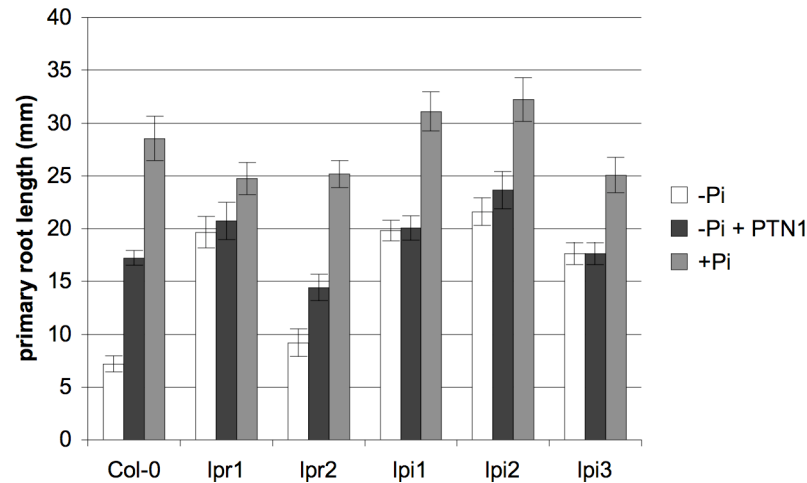

**Supplemental Figure S4.** PTN1 addition does not impact the primary root growth of Pi-insensitive mutants.

Impact of PTN1 on the primary root growth of mutants altered in their root sensitivity to Pi starvation. Measurements are of the primary root growth of 7-day-old plants grown on -Pi, -Pi +PTN1 40  $\mu$ M or +Pi conditions.
