# Supplementary material
Source: PubMed Central journal article supplement (PMC4226385)
Supplement: supp_pp.114.248112_248112Sup_fig_5.pdf [file supp_pp.114.248112_248112Sup_fig_5.pdf]

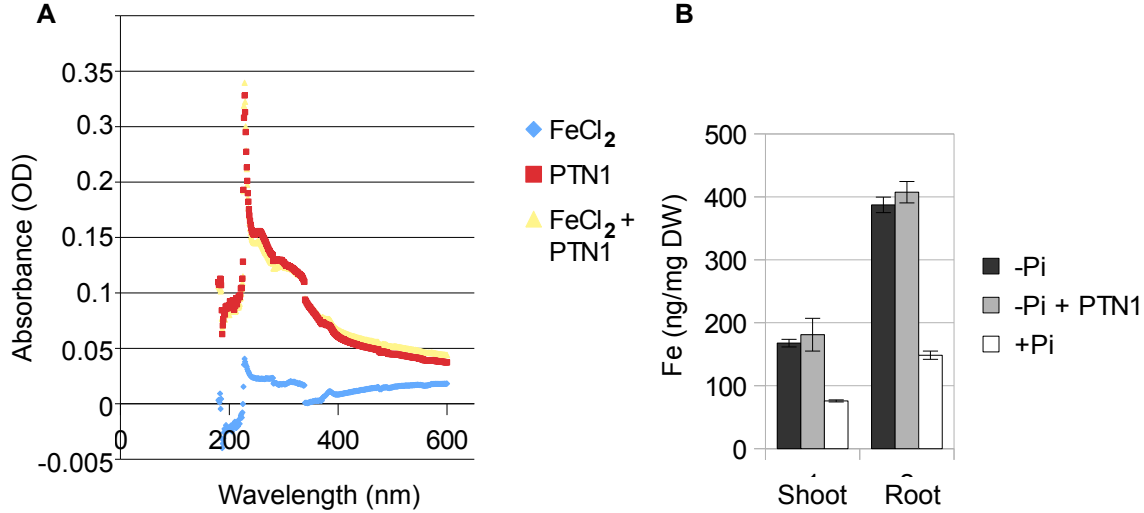

**Supplemental Figure S5.** PTN1 effects are independent of Fe signaling.

**(A)** Optical density curves for PTN1 at 40  $\mu$ M, FeCl<sub>2</sub> at 10  $\mu$ M and 40  $\mu$ M PTN1+ 10  $\mu$ M FeCl<sub>2</sub>.

**(B)** Fe content assay by ICP of plantlets grown on -Pi, -Pi + PTN1 40  $\mu$ M and +Pi.
