# Supplementary material
Source: PubMed Central journal article supplement (PMC4226385)
Supplement: supp_pp.114.248112_248112Sup_Fig_S3_new.pdf [file supp_pp.114.248112_248112Sup_Fig_S3_new.pdf]

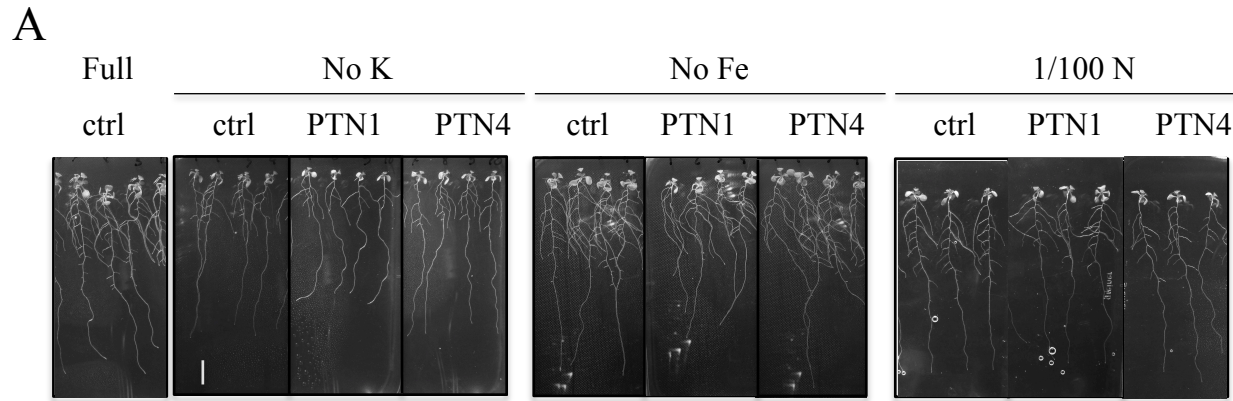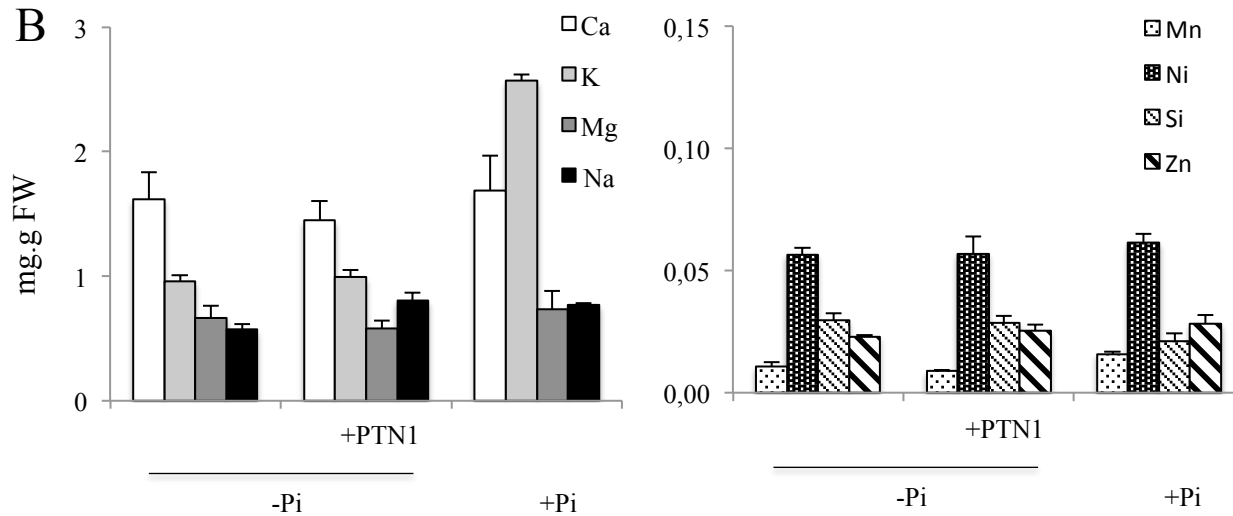

Supplemental Figure 3: PTN impact on other macro and micronutrients.

**A** Impact of PTN on root development for medium respectively depleted with potassium (K), nitrogen (N) or iron (Fe). Plants were grown for 5d in complete medium (full) then transferred in appropriate media (full or in low K or N or Fe) with or without drugs (at optimal concentration). *Scale bar=1cm*

**B** Impact of PTN on ion content measured by ICP.
