# Supplementary material
Source: PubMed Central journal article supplement (PMC4226385)
Supplement: supp_pp.114.248112_248112Sup_Table_S1.pdf [file supp_pp.114.248112_248112Sup_Table_S1.pdf]

| Compounds                                                                                              | Log P | Lipinski's rule of five | Activity | IC <sub>50</sub> (μM) |
|--------------------------------------------------------------------------------------------------------|-------|-------------------------|----------|-----------------------|
| PTN1<br>MW: 367<br>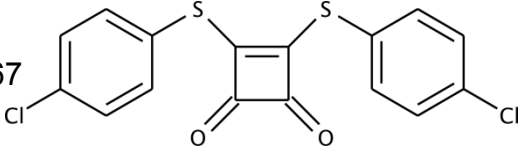   | 5.1   | Yes                     | Yes      | 13.80                 |
| PTN2<br>MW: 384<br>   | 5.0   | Yes                     | Yes      | 12.86                 |
| PTN3<br>MW: 144<br>   | 2.8   | Yes                     | Yes      | 16.44                 |
| PTN4<br>MW: 287<br>  | 5.8   | Yes                     | Yes      | 3.63                  |
| PTN5<br>MW: 271<br> | 4.7   | Yes                     | No       |                       |
| PTN6<br>MW: 158<br> | 3.0   | Yes                     | No       |                       |

**Table S1. Characteristics of PTN.**

The first column indicates the compounds studied, their name and their molecular weight. Log P indicates their solubilizing capacity (lipophilic when Log P >0). Their accordance with Lipinski's rule of five indicates that the molecules could be drugs. The IC<sub>50</sub> (half of the maximal inhibitory concentration) was calculated for the active compounds.
